# Supplementary material for: The RNA-binding protein ELAV regulates Hox RNA processing, expression and function within the Drosophila nervous system
Source: PubMed Central journal article supplement (PMC4132933; doi:10.1242/dev.101519), 2014-05
Supplement: supp_141.10.2046_DEV101519.pdf [file supp_141.10.2046_DEV101519.pdf]

**Supplementary Figure 1**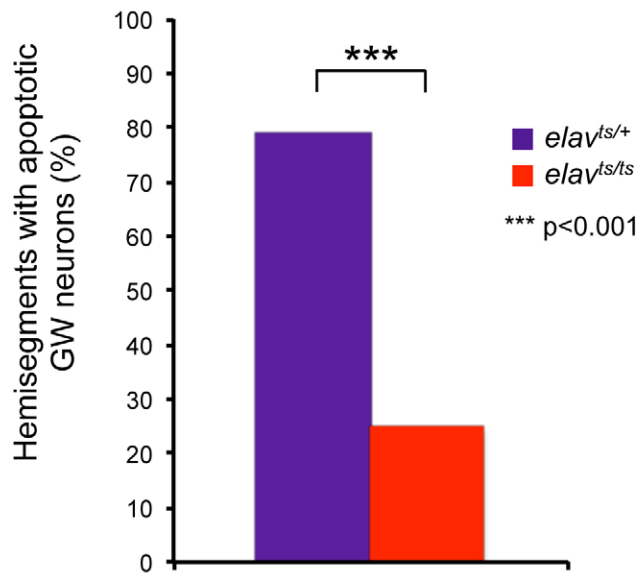

| GENOTYPE                    | GW Apoptosis % (n) |
|-----------------------------|--------------------|
| <i>elav<sup>ts/+</sup></i>  | 78,7 (47)          |
| <i>elav<sup>ts/ts</sup></i> | 25 (48)            |

**Effects of the *elav<sup>ts</sup>* allele on the apoptotic behaviour of GW neurons.** Analysis of apoptotic behaviour of GW cells in the thoracic/abdominal segments of control *elav<sup>+/ts</sup>* (purple) and *elav<sup>ts/ts</sup>* mutants (red) further confirms that genetic removal of ELAV expression leads to a significant change in the incidence of apoptosis on GW neurons.

**Supplementary Figure 2**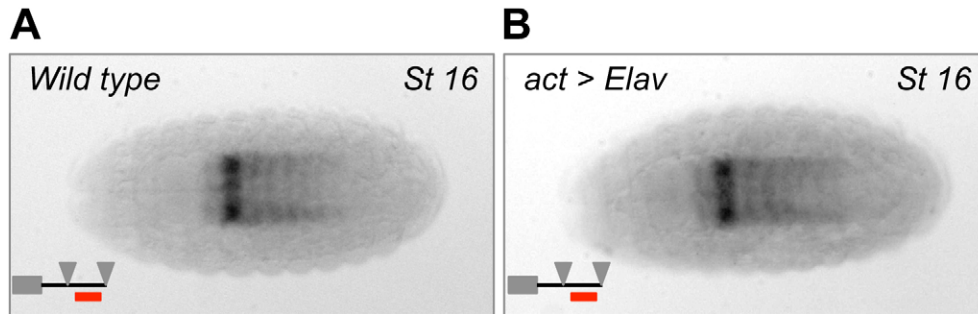

**Ectopic expression of ELAV during late embryogenesis does not cause any detectable increase in the expression of long 3'UTR *Ubx* mRNA forms.** *RNA in situ* hybridisation of stage 16 embryos with *Ubx* distal 3'UTR probes (symbolised by a red line) shows that the artificial increase of ELAV expression from a UAS-*elav* construct driven by the *actin-gal4* driver (*act>Elav*, (B)) shows no appreciable change in the pattern of long *Ubx* 3'UTR expression when compared to *wild type* embryos (A) suggesting that endogenous expression of ELAV at this late embryonic stage is likely saturating and/or that a maximal production of long-3'UTR *Ubx* RNA forms had been achieved.

## Supplementary Figure 3

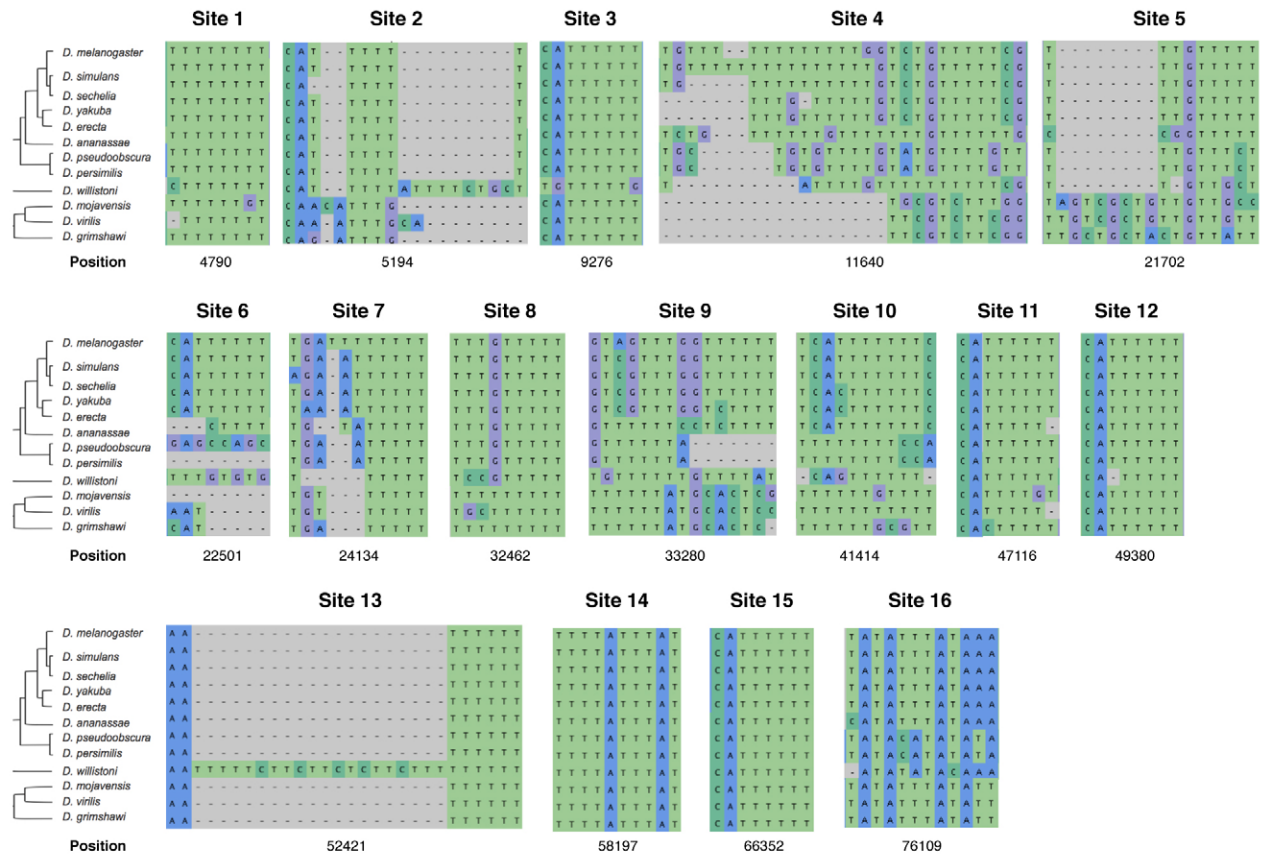

**Computational prediction of putative ELAV binding sites (pEBs) on *Ubx* RNAs detects sixteen candidate elements.** In order to determine putative ELAV binding sites within *Ubx* RNA we combined the scanning of *Drosophila melanogaster Ubx* sequences for elements with high similarity to experimentally validated ELAV-binding sites present in the genes *neuroglian* (*nrg*, Nrg-like) (ttttgtgtg, ttgtttttt, ttgtttttt, ttttattat, ttttttt) (Lisbin et al., 2001) and *erect-wing* (*ewg*, ewg-like) (aauuuuuu, cauuuuuu) (Soller, M., and K. White, 2003) with an analysis of the evolutionary conservation of these elements across twelve related *Drosophila* species (*D. melanogaster*, *D. simulans*, *D. sechellia*, *D. yakuba*, *D. erecta*, *D. ananassae*, *D. pseudoobscura*, *D. persimilis*, *D. willistoni*, *D. mojavensis*, *D. virilis*, *D. grimshawi*). This approach defined fifteen putative *Elav* binding sites (pEBs) which (i) presented an exact match to those in *nrg* and *ewg* and (ii) were evolutionarily conserved in a homologous position across eight or more *Drosophila* species (i.e. ultraconserved) out of the twelve *Drosophilid* species investigated. In addition to sequence elements similar to those present in *nrg* and *ewg* RNAs we also included in our list of *Ubx* pEBs a previously described A-U rich element (ARE) present in the 3'UTR of *D. melanogaster Ubx* (Site 16) (Cairrao et al., 2009) given that ARE elements were shown to be critical regulators of RNA metabolism through binding of Hu proteins (Lopez de Silanes et al., 2004).

**Supplementary Figure 4**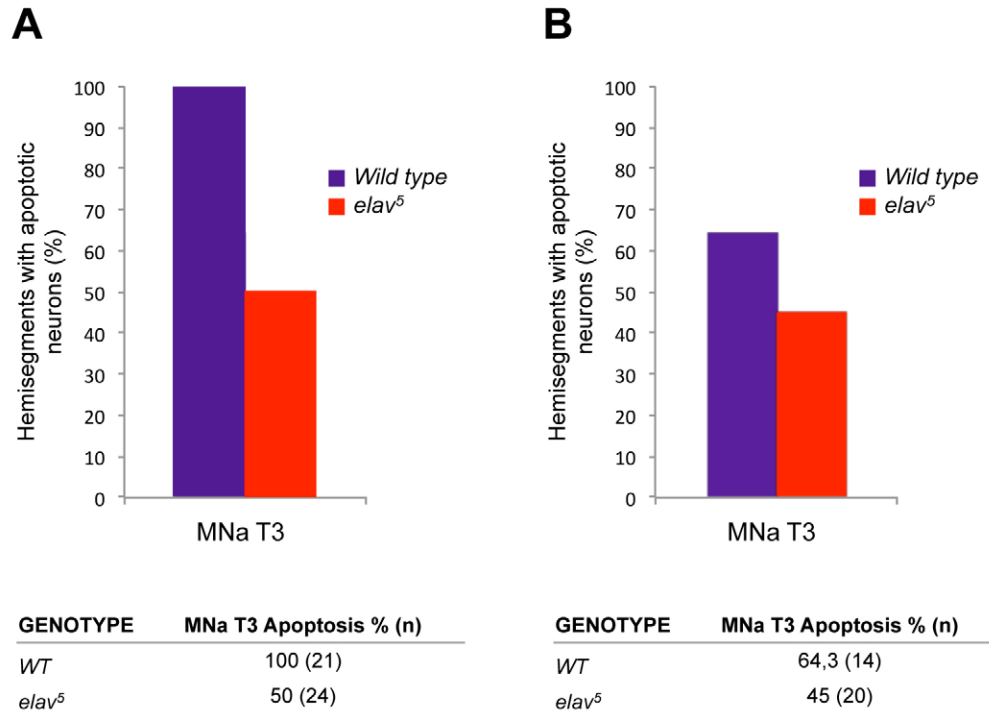

**Effects of ELAV on the apoptotic behaviour of MNa neurons.** Analysis of apoptotic behaviour of MNa cells in the posterior thoracic segment (T3) in wild type (purple) and *elav<sup>5</sup>* mutants (red) by means of: (A) the fluorescent genetically-encoded caspase sensor *Apollinaire* (Bardet et al. (2008) PNAS 105(37): 13901-13905) and (B) the number of Dcp-1<sup>+</sup> cells demonstrates that MNa apoptotic rates are markedly reduced (30-50% reduction depending on method) when Elav is absent from the system confirming the same trend observed in the GW motorneuron system.

## Supplementary Figure 5

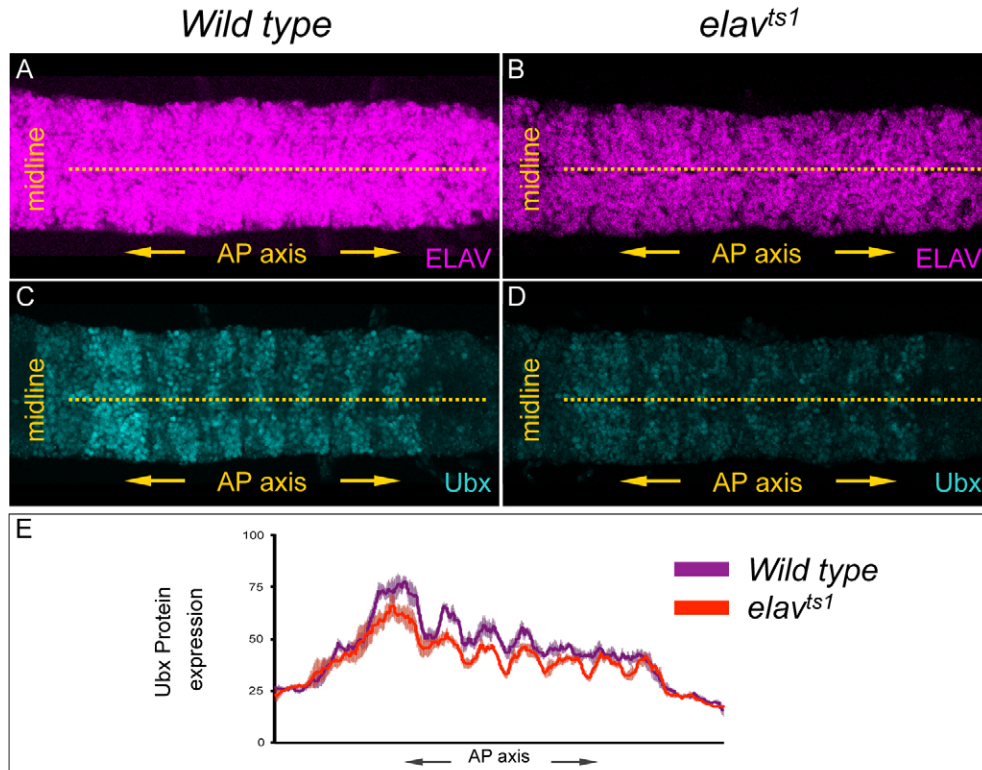

**Effects of the *elav<sup>ts</sup>* allele on expression of Ubx protein.** (A,B) Comparison of ELAV protein (magenta) expression levels in dissected ventral nerve cords of wild type (A) and *elav<sup>ts1</sup>* mutant (B) embryos at stage 16 shows that ELAV protein levels are reduced in the *elav<sup>ts1</sup>* mutant. (C,D) Expression levels of Ubx protein (cyan) are clearly higher in wild type (C) than in *elav<sup>ts1</sup>* mutant embryos (D) further confirming that reducing expression of ELAV protein results in lower levels of Ubx protein within the CNS. (E) Average profile quantification of Ubx protein along the A-P axis of wild type (purple) and *elav<sup>ts1</sup>* mutant embryos (red) (standard error is indicated in light purple and pink shading, respectively)
